# Supplementary material for: Long-range Transport Impacts on Surface Aerosol Concentrations and the Contributions to Haze Events in China: an HTAP2 Multi-Model Study
Source: Copernicus journal article supplement (doi:10.5194/acp-2018-91), 2018-04-11
Supplement: Supplementary file 1 [file acp-2018-91-supplement.pdf]

1 **Supplementary material for:**  
2 **Long-range Transport Impacts on Surface Aerosol Concentrations and the Contributions to**  
3 **Haze Events in China: an HTAP2 Multi-Model Study**

4  
5 Xinyi Dong<sup>1</sup>, Joshua S. Fu<sup>1</sup>, Qingzhao Zhu<sup>1</sup>, Jian Sun<sup>1</sup>, Jiani Tan<sup>1</sup>, Terry Keating<sup>2</sup>, Takashi Sekiya<sup>3</sup>, Kengo  
6 Sudo<sup>3</sup>, Louisa Emmons<sup>4</sup>, Simone Tilmes<sup>4</sup>, Jan Eiof Jonson<sup>5</sup>, Michael Schulz<sup>5</sup>, Huisheng Bian<sup>6</sup>, Mian Chin<sup>7</sup>,  
7 Yanko Davila<sup>8</sup>, Daven Henze<sup>8</sup>, Toshihiko Takemura<sup>9</sup>, Anna Maria Katarina Benedictow<sup>5</sup>, Kan Huang<sup>1, 10</sup>

8  
9 <sup>1</sup>Department of Civil and Environmental Engineering, The University of Tennessee, Knoxville,  
10 Tennessee, USA

11 <sup>2</sup>Environmental Protection Agency, Applied Science and Education Division, National Center for  
12 Environmental Research, Office of Research and Development, Headquarters, Federal Triangle,  
13 Washington, DC 20460, USA

14 <sup>3</sup>Nagoya University, Furo-cho, Chikusa-ku, Nagoya, Japan

15 <sup>4</sup>Atmospheric Chemistry Observations and Modeling Laboratory, National Center for Atmospheric  
16 Research, Boulder, Colorado, USA

17 <sup>5</sup>Norwegian Meteorological Institute, Oslo, Norway

18 <sup>6</sup>Goddard Earth Sciences and Technology Center, University of Maryland, Baltimore, MD, USA

19 <sup>7</sup>Earth Sciences Division, NASA Goddard Space Flight Center, Greenbelt, MD, USA

20 <sup>8</sup>Department of Mechanical Engineering, University of Colorado, Boulder, CO, USA

21 <sup>9</sup>Research Institute for Applied Mechanics, Kyushu University, Fukuoka, Japan

22 <sup>10</sup>Center for Atmospheric Chemistry Study, Department of Environmental Science and Engineering,  
23 Fudan University, Shanghai 200433, China

24  
25  
26 Corresponding author: jsfu@utk.edu  
27  
28

29 **1. Model evaluation**

30 Evaluation statistics including mean bias (MB), coefficient of determination ( $R^2$ ), and Normalized  
31 Mean Bias (NMB) for CO, SO<sub>2</sub>, NH<sub>3</sub>, NO<sub>2</sub>, SO<sub>4</sub><sup>2-</sup>, NO<sub>3</sub><sup>-</sup>, and NH<sub>4</sub><sup>+</sup> are summarized in Table S1.  
32 Measurements from the EBAS and EANET dataset are used to validate the model performance in Europe  
33 and East Asia respectively. Both of them are averaged from daily frequency to monthly means to  
34 compromise with the model simulations. The number of stations that provide valid observation data is also  
35 listed to present the availability of the measurements, but it is important to realize that data from the stations  
36 falling into the same model grid is averaged first before comparing with model simulations.

37  
38 Table S1 Evaluation statistics for model ensemble mean

| Species         | Model           | Europe - EBAS |        |                | East Asia - EANET     |        |                |
|-----------------|-----------------|---------------|--------|----------------|-----------------------|--------|----------------|
|                 |                 | MB            | NMB    | R <sup>2</sup> | MB                    | NMB    | R <sup>2</sup> |
| CO              | CAM-chem        | -10.6 ppbv    | -7.7%  | 0.4            |                       |        |                |
|                 | CHASER          | -8.8 ppbv     | -6.4%  | 0.3            |                       |        |                |
|                 | EMEP            | 2.5 ppbv      | 1.8%   | 0.5            |                       |        |                |
|                 | GEOSCHEMADJOINT | -1.6 ppbv     | -1.2%  | 0.5            |                       |        |                |
| SO <sub>2</sub> | CAM-chem        | 1.8 ppbv      | 114.7% | 0.6            | 1.2 μg/m <sup>3</sup> | 47.9%  | 0.9            |
|                 | CHASER          | 1.9 ppbv      | 111.4% | 0.5            | 0.6 μg/m <sup>3</sup> | 22.8%  | 0.9            |
|                 | EMEP            | -0.5 ppbv     | -31.6% | 0.6            | 1.6 μg/m <sup>3</sup> | 68.1%  | 0.9            |
|                 | GEOS5           | 1.6 ppbv      | 95.9%  | 0.6            | 3.2 μg/m <sup>3</sup> | 134.0% | 0.9            |

|                               |                 |                        |        |     |                         |        |     |
|-------------------------------|-----------------|------------------------|--------|-----|-------------------------|--------|-----|
| NH <sub>3</sub>               | GEOSCHEMADJOINT | -0.6 ppbv              | -36.5% | 0.5 | 1.2 µg/m <sup>3</sup>   | 50.0%  | 0.9 |
|                               | SPRINTARS       | -0.6 ppbv              | -36.2% | 0.4 | 1.1 µg/m <sup>3</sup>   | 44.7%  | 0.9 |
|                               | CAM-chem        | -2.1 ppbv              | -37.5% | 0.7 | -2.7 µg/m <sup>3</sup>  | -74.1% | 0.3 |
|                               | CHASER          | -1.2 ppbv              | -20.5% | 0.5 | -2.4 µg/m <sup>3</sup>  | -63.1% | 0.3 |
|                               | EMEP            | -2.2 ppbv              | -38.9% | 0.8 | -2.0 µg/m <sup>3</sup>  | -52.3% | 0.3 |
|                               | GEOSCHEMADJOINT | 0.1 ppbv               | 1.3%   | 0.7 | -2.3 µg/m <sup>3</sup>  | -58.9% | 0.3 |
| NO <sub>2</sub>               | CAM-chem        | -37.2 ppbv             | -85.3% | 0.4 | -11.1 µg/m <sup>3</sup> | -75.1% | 0.8 |
|                               | CHASER          | -5.7 ppbv              | -37.9% | 0.2 | -12.3 µg/m <sup>3</sup> | -83.9% | 0.2 |
|                               | EMEP            | -7.9 ppbv              | -52.9% | 0.2 | -8.5 µg/m <sup>3</sup>  | -57.7% | 0.8 |
|                               | GEOSCHEMADJOINT | -34.6 ppbv             | -79.3% | 0.4 | -11.9 µg/m <sup>3</sup> | -80.9% | 0.8 |
| SO <sub>4</sub> <sup>2-</sup> | CAM-chem        | 3.9 µg/m <sup>3</sup>  | 46.9%  | 0.5 | 1.0 µg/m <sup>3</sup>   | 28.4%  | 0.5 |
|                               | CHASER          | 7.7 µg/m <sup>3</sup>  | 915.5% | 0.7 | 1.7 µg/m <sup>3</sup>   | 44.4%  | 0.6 |
|                               | EMEP            | 2.7 µg/m <sup>3</sup>  | 316.9% | 0.3 | -1.5 µg/m <sup>3</sup>  | -41.3% | 0.7 |
|                               | GEOS5           | 2.2 µg/m <sup>3</sup>  | 261.9% | 0.6 | -1.6 µg/m <sup>3</sup>  | -43.6% | 0.7 |
|                               | GEOSCHEMADJOINT | 2.3 µg/m <sup>3</sup>  | 270.3% | 0.6 | -1.3 µg/m <sup>3</sup>  | -35.7% | 0.7 |
|                               | SPRINTARS       | 2.9 µg/m <sup>3</sup>  | 350.6% | 0.2 | 1.8 µg/m <sup>3</sup>   | 52.3%  | 0.3 |
| NO <sub>3</sub> <sup>-</sup>  | CHASER          | 9.5 µg/m <sup>3</sup>  | 110%   | 0.1 | -0.7 µg/m <sup>3</sup>  | -43.7% | 0.5 |
|                               | EMEP            | 0.6 µg/m <sup>3</sup>  | 22.6%  | 0.8 | -0.1 µg/m <sup>3</sup>  | -6.6%  | 0.6 |
|                               | GEOSCHEMADJOINT | 10.7 µg/m <sup>3</sup> | 434.8% | 0.7 | 0.2 µg/m <sup>3</sup>   | 15.0%  | 0.5 |
| NH <sub>4</sub> <sup>+</sup>  | CAM-chem        | 0.04 µg/m <sup>3</sup> | 7.2%   | 0.2 | 0.62 µg/m <sup>3</sup>  | 61.4%  | 0.5 |
|                               | CHASER          | 0.2 µg/m <sup>3</sup>  | 34.1%  | 0.3 | 0.8 µg/m <sup>3</sup>   | 76.2%  | 0.5 |
|                               | EMEP            | -0.3 µg/m <sup>3</sup> | -59.5% | 0.2 | -0.1 µg/m <sup>3</sup>  | 8.6%   | 0.7 |
|                               | GEOSCHEMADJOINT | 0.8 µg/m <sup>3</sup>  | 139.5% | 0.2 | 1.3 µg/m <sup>3</sup>   | 120.6% | 0.7 |

39

40 **2. Anthropogenic emission**

41

42 Emission data shown in Table S2 is collected from the Emissions Database for Global Atmospheric  
43 Research (EDGARv4.3.1). National scale emissions are summed up to estimate the total anthropogenic  
44 emission for each region defined by the HTAP2 experiment, as: EUR: the Organisation for Economic Co-  
45 operation and Development (OECD) members, and central Europe countries; RBU: Russia, Belarussia, and  
46 Ukraine; EAS: China, Mongolia, North Korea, South Korea, and Japan. The data for none methane VOC  
47 (NMVOC) is from anthropogenic activities only (e.g., residential sector, production of chemicals, solvent  
48 and other product use) and does not include the biogenic sector.

49

50

Table S2. Anthropogenic emissions in ERU and EAS (unit is Tg/year)

|                 | EUR   |       |      |      | RBU  |      |      |      | EAS   |       |       |       |
|-----------------|-------|-------|------|------|------|------|------|------|-------|-------|-------|-------|
|                 | 2000  | 2008  | 2009 | 2010 | 2000 | 2008 | 2009 | 2010 | 2000  | 2008  | 2009  | 2010  |
| SO <sub>2</sub> | 9.95  | 6.80  | 6.26 | 6.18 | 5.31 | 4.22 | 3.88 | 3.88 | 25.75 | 33.09 | 32.99 | 34.23 |
| NH <sub>3</sub> | 6.04  | 5.71  | 5.65 | 5.61 | 2.75 | 2.66 | 2.48 | 2.47 | 11.85 | 14.13 | 14.45 | 14.77 |
| NO <sub>x</sub> | 11.17 | 10.17 | 9.49 | 9.46 | 5.73 | 5.34 | 4.96 | 4.83 | 19.58 | 27.81 | 28.23 | 29.01 |
| BC              | 0.31  | 0.26  | 0.25 | 0.24 | 0.06 | 0.05 | 0.05 | 0.05 | 1.20  | 1.57  | 1.59  | 1.67  |
| OC              | 0.47  | 0.43  | 0.43 | 0.45 | 0.19 | 0.16 | 0.14 | 0.13 | 3.30  | 3.75  | 3.81  | 3.98  |
| NMVOC           | 8.00  | 5.57  | 5.26 | 5.03 | 4.36 | 4.84 | 4.66 | 4.53 | 13.61 | 17.76 | 17.96 | 18.78 |
| PM              | 2.54  | 2.46  | 2.41 | 2.49 | 0.98 | 1.00 | 0.92 | 0.87 | 15.29 | 18.87 | 19.25 | 20.11 |

51

### 52 3. NCDC observations and haze events in China

53 The locations of the NCDC observation stations in China are shown in Fig.S1(a). Daily visibility  
54 and relatively humidity data is collected from a total of 473 NCDC stations to identify the location and time  
55 period of haze events. The number of haze days at each station are then mapped into the models grid to  
56 mark the haze existence and assist the analysis of model data. Fig.S1(b) shows the NCDC identified haze  
57 days mapped into the SPRINTARS model grid at  $1.1^{\circ} \times 1.1^{\circ}$ . The NCDC observations suggested that  
58 majority of the haze events occurred in the central, northeast, and southeast part of China at above  $105^{\circ}\text{E}$   
59 longitude areas.

60

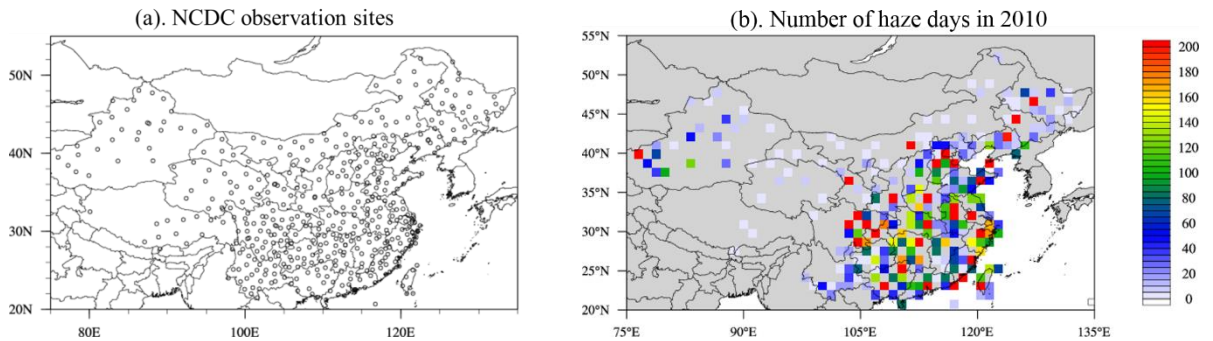

61 Figure S1. (a) Locations of the NCDC stations; (b) Number of haze days identified with NCDC observation  
62 and mapped into the SPRINTARS model grid.
